# Supplementary material
Source: Springer Nature journal article supplement (https://www.springermedizin.de/resource/supplementary/12911_2005_103_MOESM5_ESM.pdf/9527132)

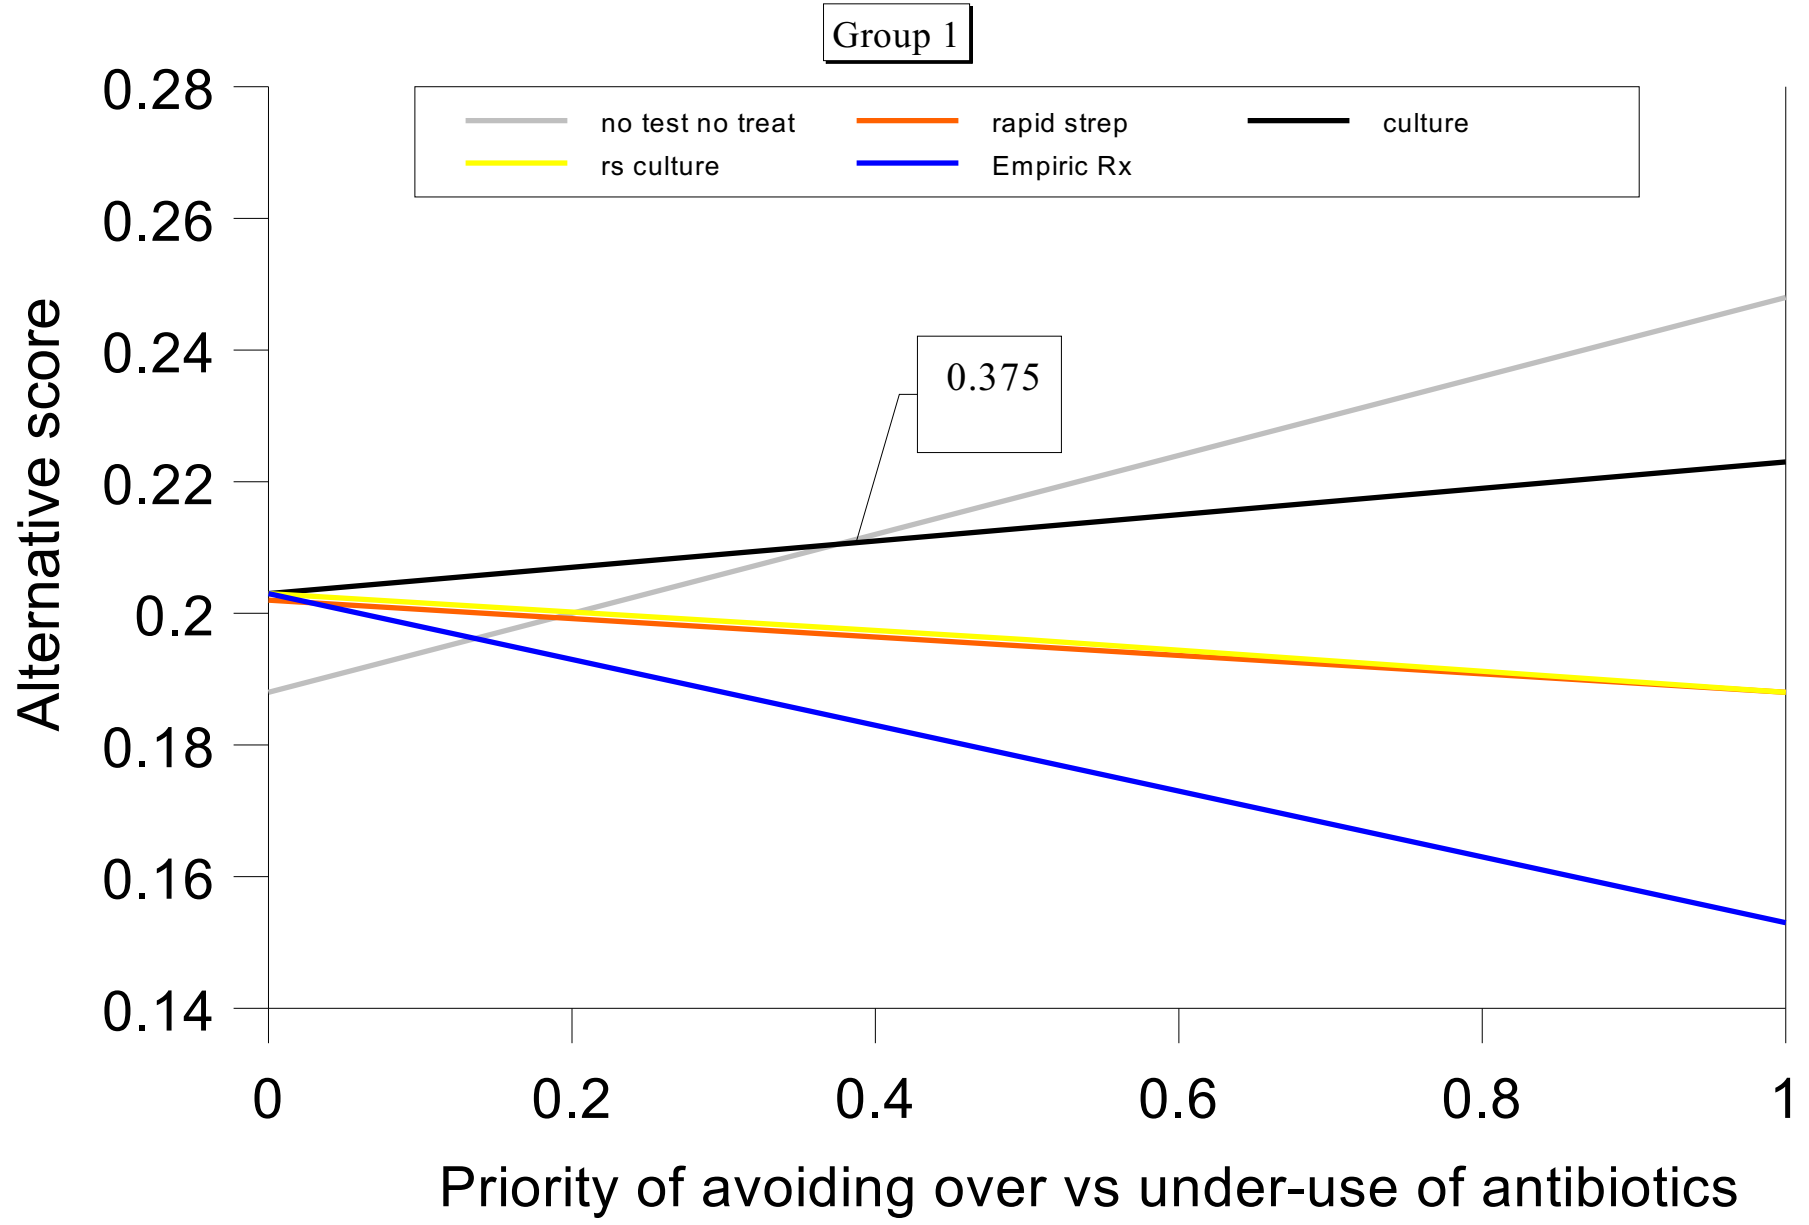

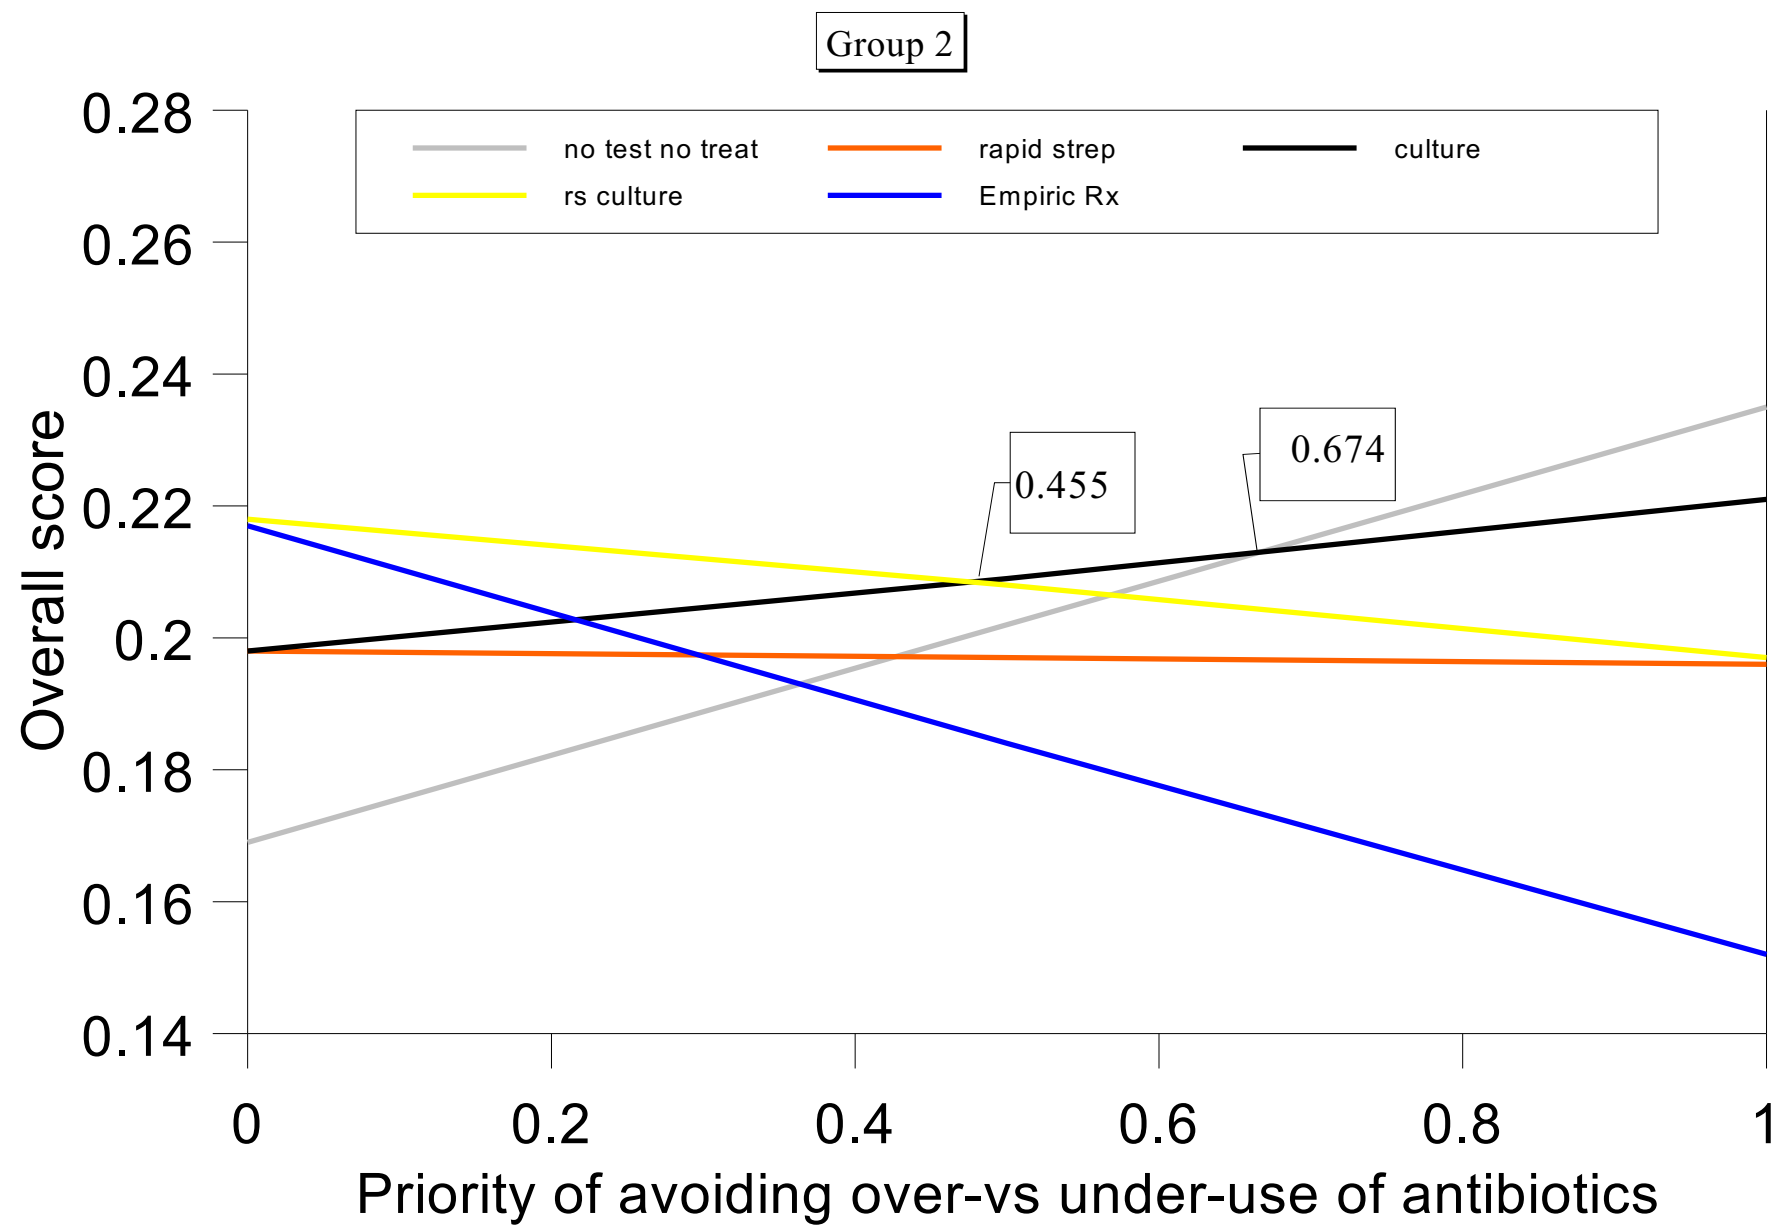

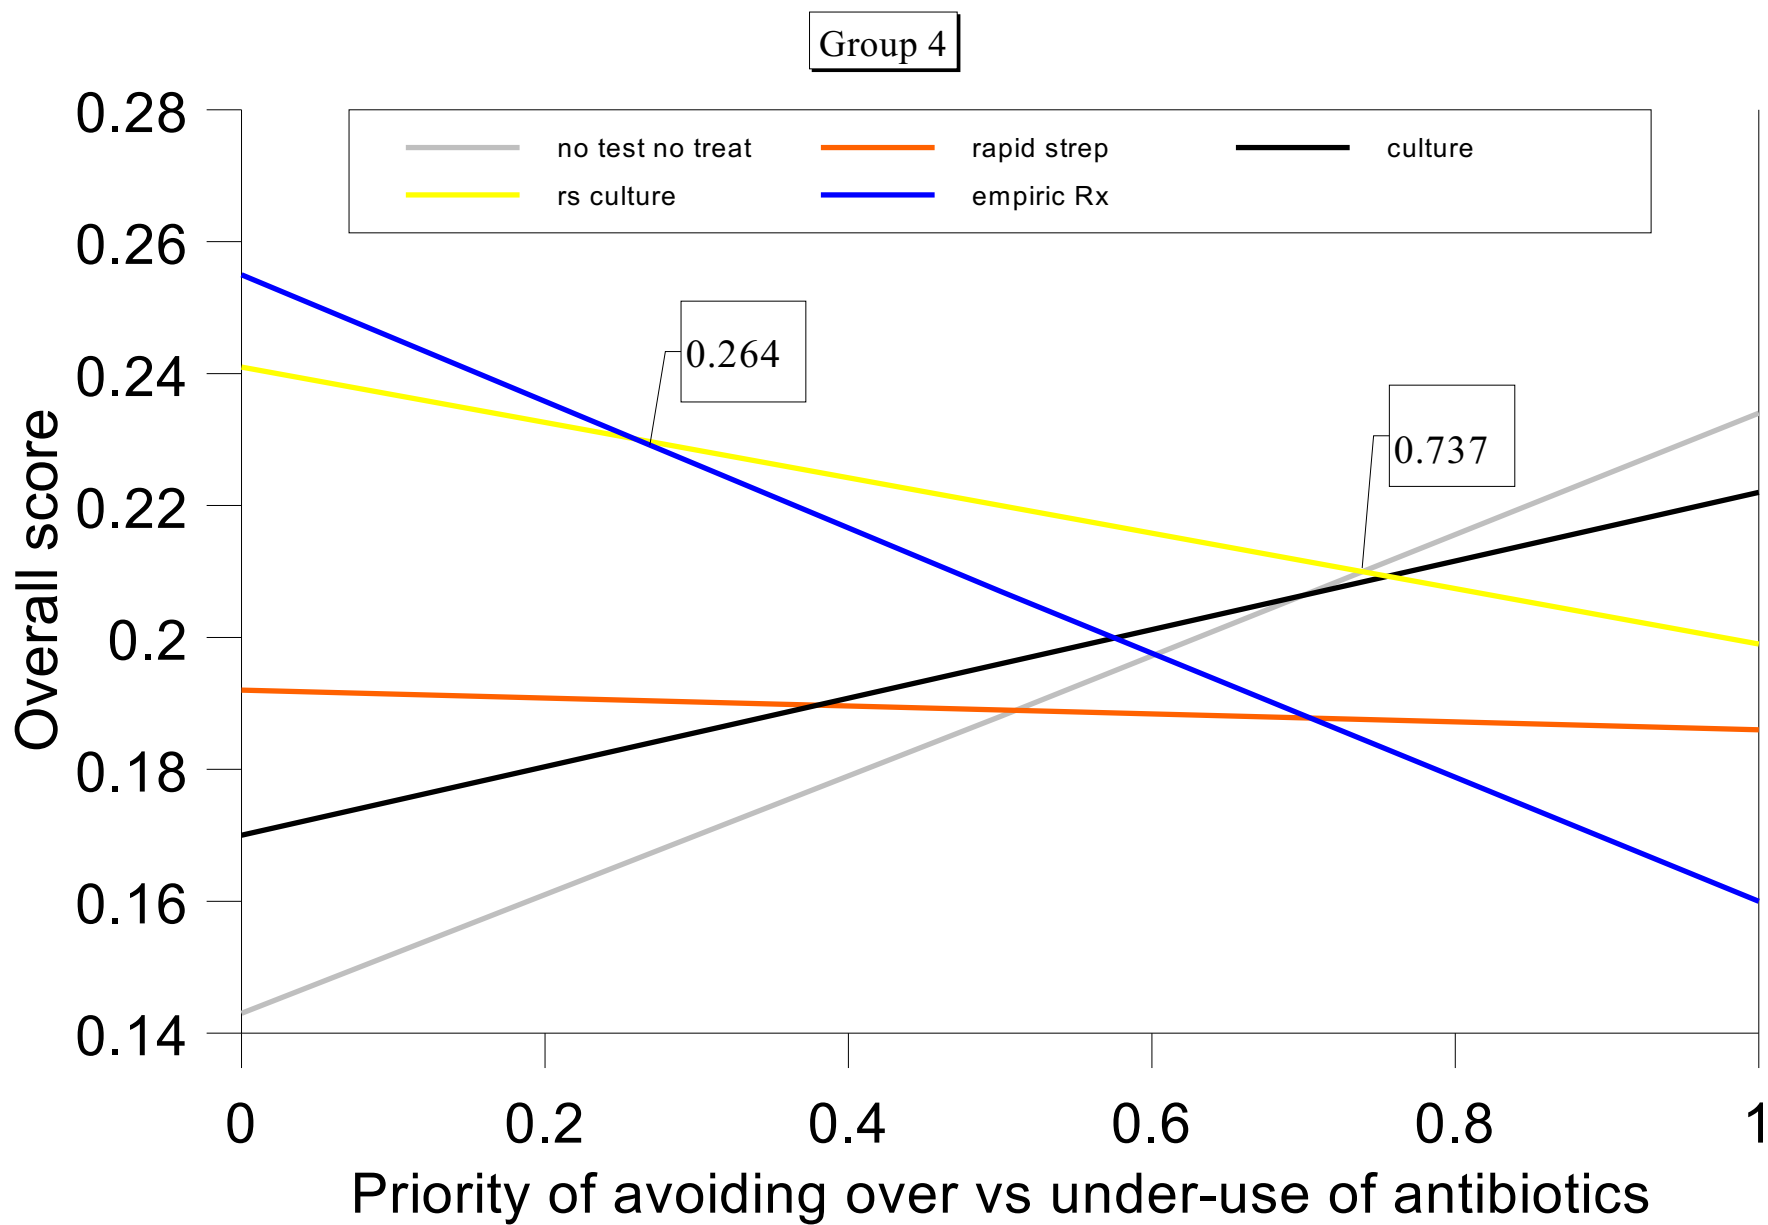

Supplement: MOESM5 [file 9527132]
